# Supplementary material for: Privacy preserving secure expansive aggregation with malicious node identification in linear wireless sensor networks
Source: Springer Nature journal article supplement (doi:10.1007/s11704-021-9460-6), 2021-08-03

Privacy preserving secure expansive  
aggregation with malicious node  
identification in linear wireless  
sensor networks

**Kaushal SHAH, Devesh JINWALA**

Frontiers of Computer Science, DOI: [10.1007/s11704-021-9460-6](https://doi.org/10.1007/s11704-021-9460-6)

# Problems & Ideas

- The following problems related to security in linear Wireless Sensor Network (WSN) are addressed:
  - Dividing the network into two halves
  - Integrity and Privacy preservation of data
  - Node capture and Collusion attacks
  - Malicious node Detection as well as Identification
- Idea: The Proposed Framework

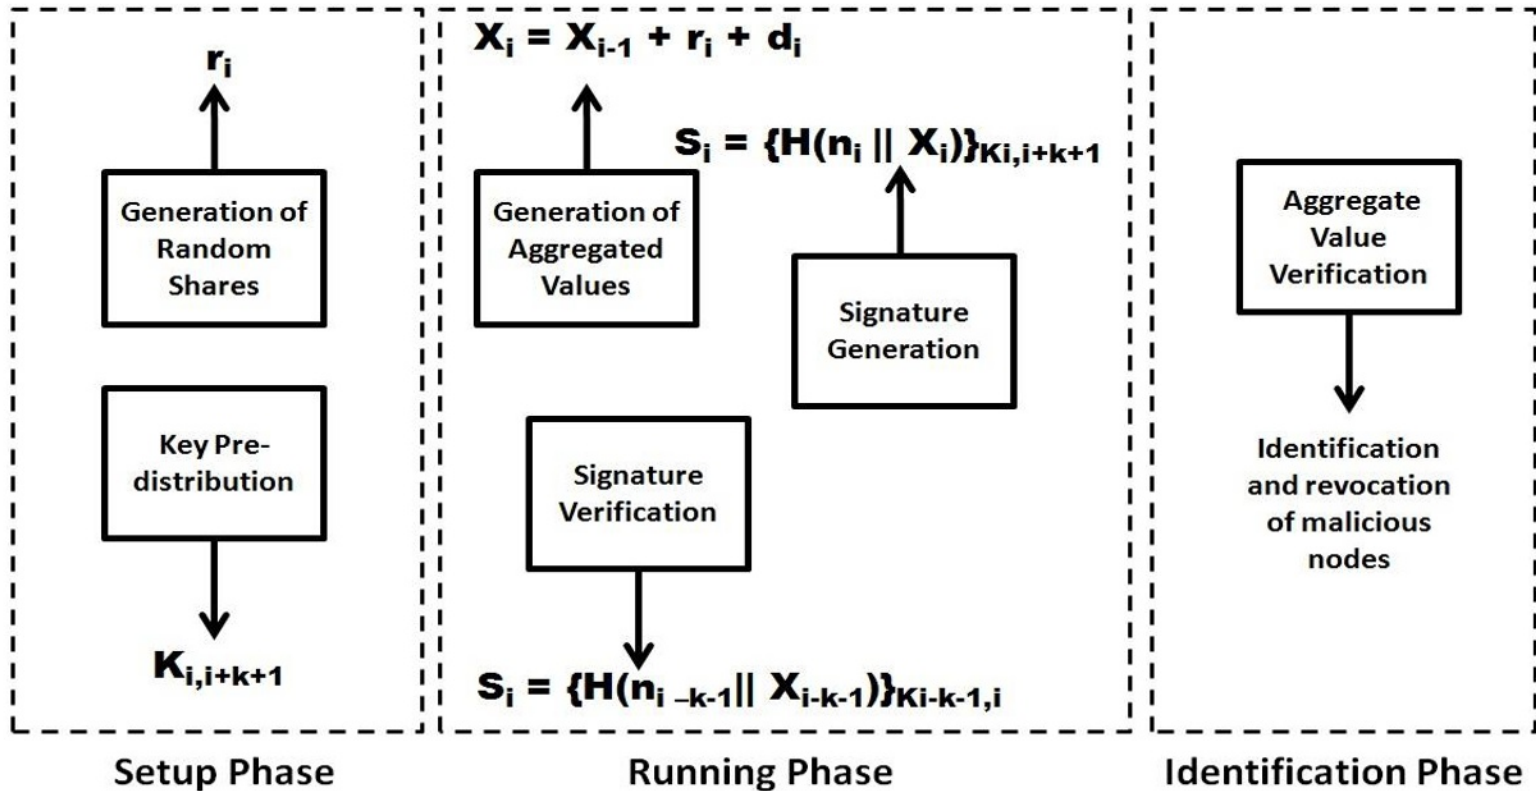

# Main Contributions

**The Proposed Method requires the Least Communication cost for achieving the security goals**

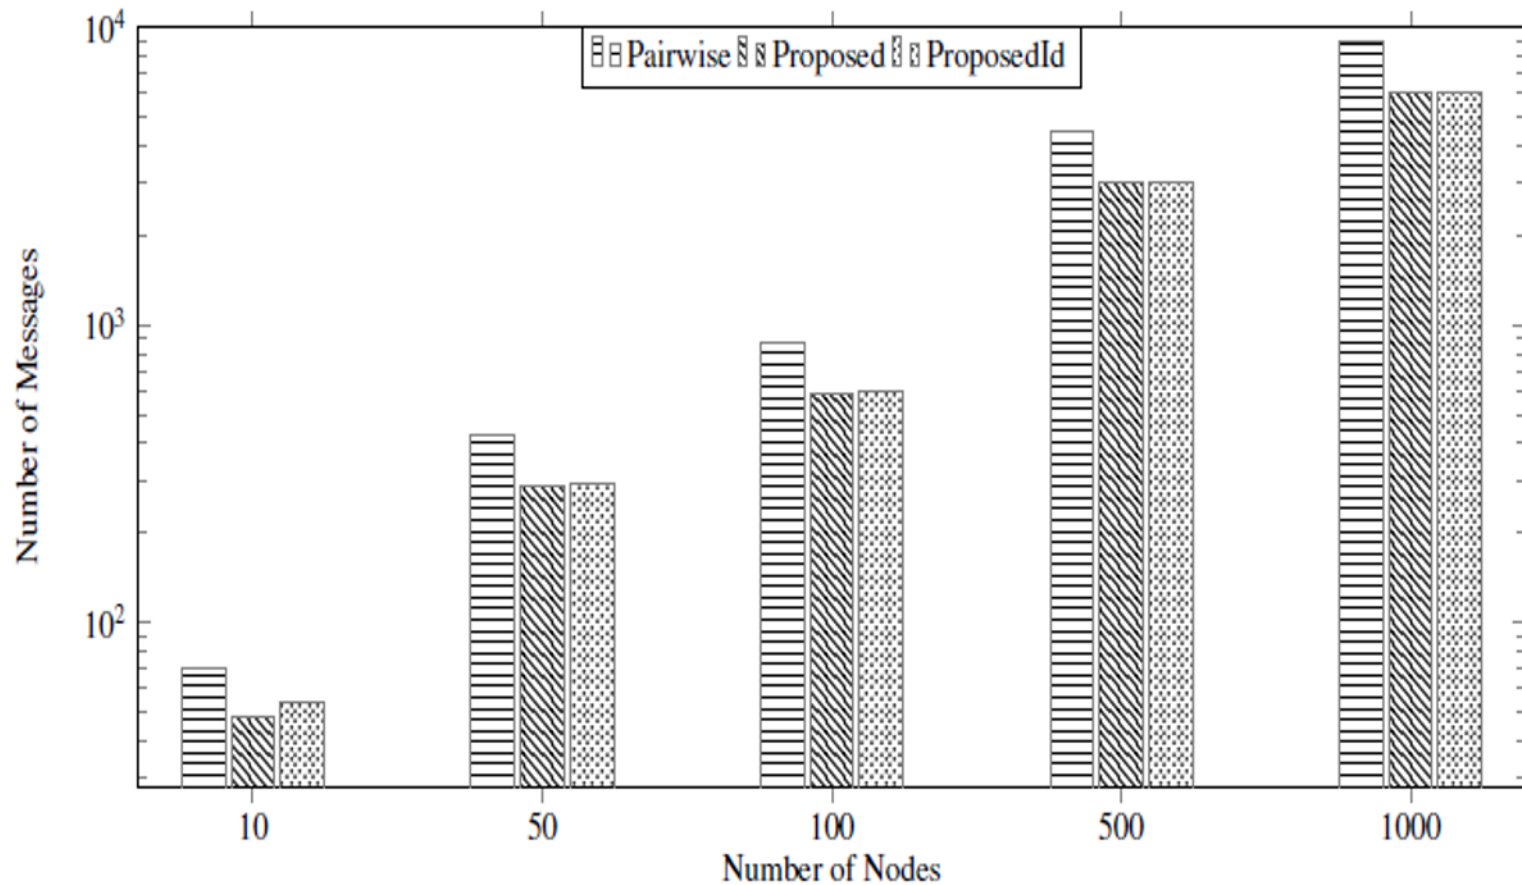

Supplement: 11704_2021_9460_MOESM1_ESM.pdf [file 11704_2021_9460_MOESM1_ESM.pdf]
